# Supplementary material for: Development of Cellular High-Protein Foods: Third-Generation Yellow Pea and Red Lentil Puffed Snacks
Source: MDPI journal article supplement (doi:10.3390/foods11010038), 2021-12-24
Supplement: s1 [file s1]

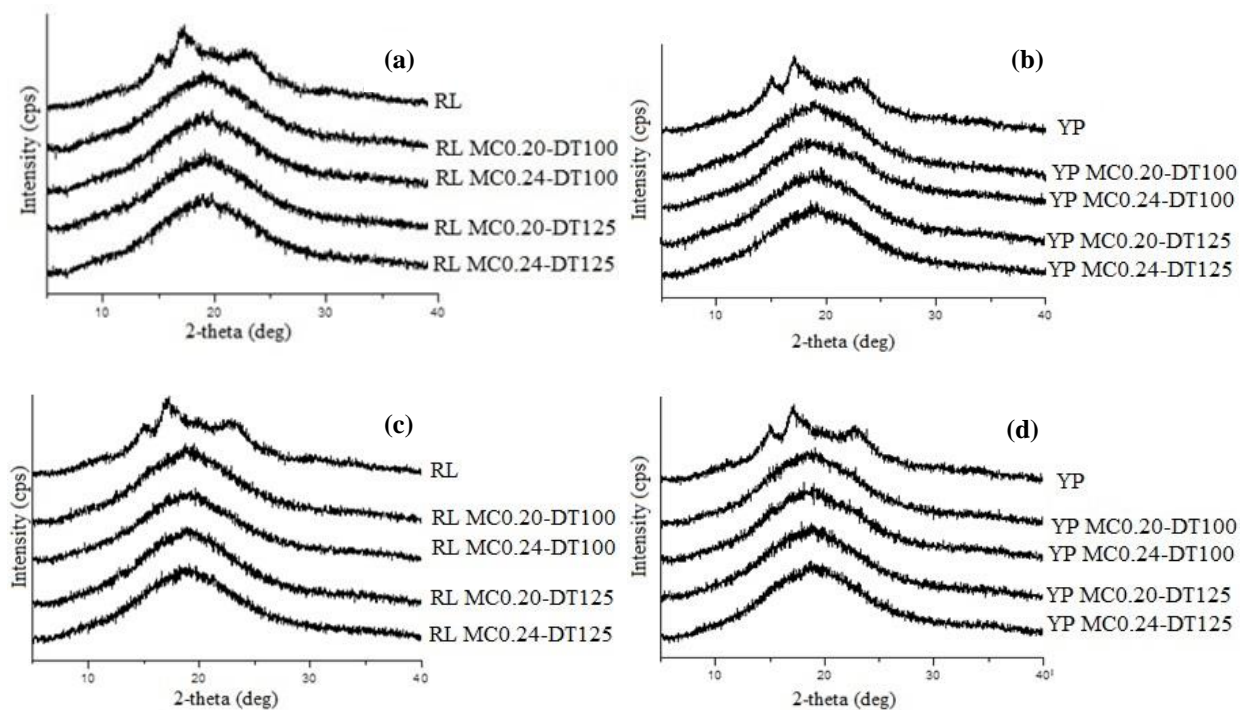

**Figure S1.** X-ray diffraction patterns of second-generation (a and b) and third-generation (c and d) yellow pea (YP) and red lentil (RL) products with feed moisture contents of 0.20 and 0.24 kg water per kg dry flour (MC0.20 and MC0.24, respectively) at 100 °C and 125 °C die temperature (DT100 and DT125, respectively).

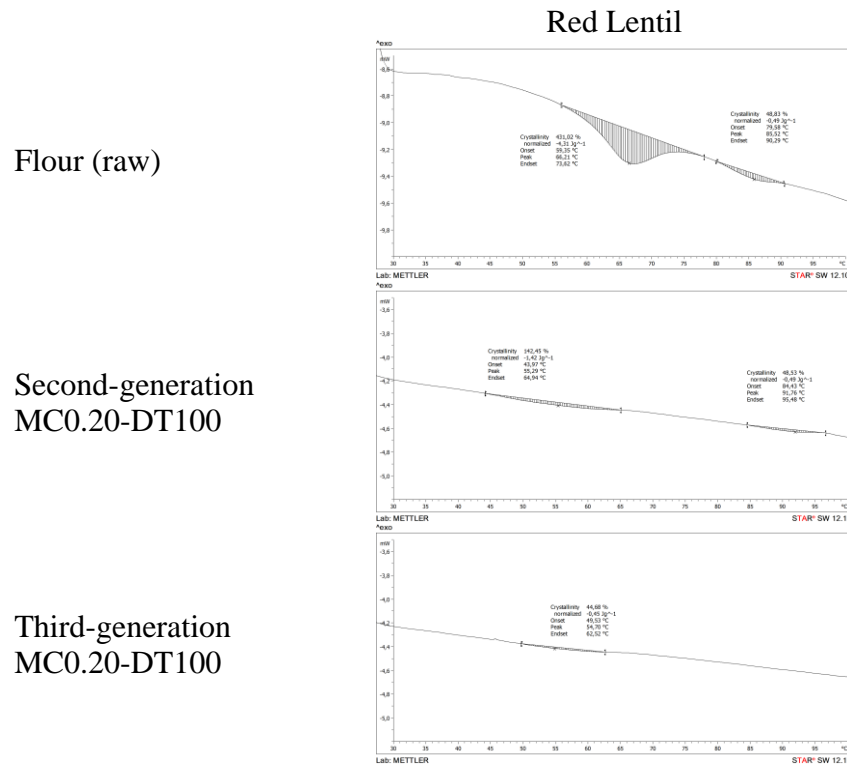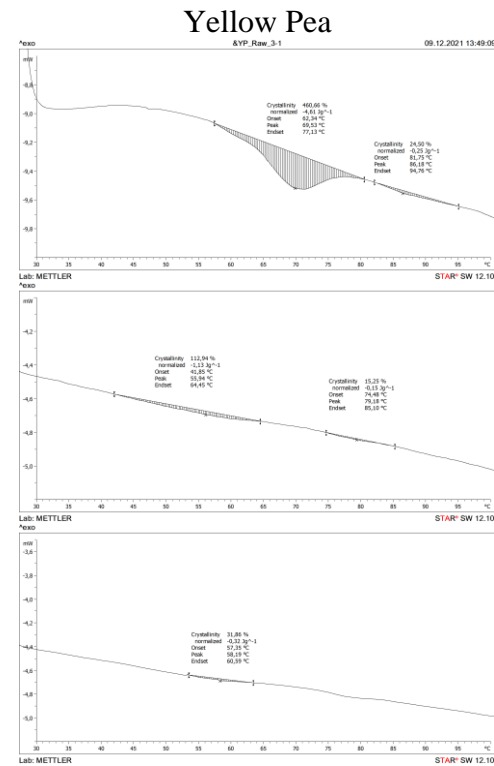

**Figure S2.** DSC thermograms of red lentil (RL) and yellow pea (YP) flours, second-generation and third-generation red lentil and yellow pea products with feed moisture content of 0.20 kg water per kg dry flour (MC0.20) at 100 °C die temperature (DT100).

**Table S1.** Pearson correlation coefficients between extrusion variables and extrudate properties in red lentil (RL) third-generation products.

|                | MC   | Torque | Die      |       |       | Density | L*    | a*    | b*    | $\Delta E$ | Hardness | Crunchiness | Crispiness | T <sub>0</sub> | T <sub>p</sub> | $\Delta H$ |
|----------------|------|--------|----------|-------|-------|---------|-------|-------|-------|------------|----------|-------------|------------|----------------|----------------|------------|
|                |      | e      | pressure | SME   | EI    | y       |       |       |       |            | s        | s           | s          |                |                |            |
|                | 0.00 |        |          | -     |       |         | -     |       |       | -          |          |             |            |                |                | -          |
| DT             | 0    | -0.446 | -0.832   | 0.893 | 0.700 | -0.954  | 0.781 | 0.903 | 0.683 | 0.757      | 0.213    | 0.470       | 0.358      | 0.685          | 0.806          | 0.620      |
|                |      |        |          | -     |       |         |       | -     | -     |            |          |             |            |                |                | -          |
| MC             |      | -0.893 | -0.532   | 0.446 | 0.254 | -0.129  | 0.417 | 0.322 | 0.522 | 0.373      | 0.019    | 0.266       | 0.150      | 0.677          | 0.281          | 0.688      |
|                |      |        |          | -     |       |         |       | -     | -     |            |          |             |            | -              | -              |            |
| Torque         |      |        | 0.852    | 0.801 | 0.424 | 0.367   | 0.002 | 0.115 | 0.180 | 0.061      | 0.426    | -0.350      | 0.093      | 0.903          | 0.594          | 0.912      |
| Die            |      |        |          | -     |       |         |       | -     | -     |            |          |             |            | -              | -              |            |
| pressure       |      |        |          | 0.986 | 0.749 | 0.726   | 0.514 | 0.608 | 0.639 | 0.442      | 0.268    | -0.490      | -0.034     | 0.905          | 0.777          | 0.910      |
|                |      |        |          | -     |       |         |       | -     | -     |            |          |             |            | -              | -              |            |
| SME            |      |        |          |       | 0.757 | 0.812   | 0.578 | 0.669 | 0.679 | 0.513      | 0.204    | -0.482      | -0.031     | 0.906          | 0.828          | 0.881      |
|                |      |        |          |       |       |         | -     |       |       |            |          |             |            |                |                | -          |
| EI             |      |        |          |       |       | -0.825  | 0.420 | 0.587 | 0.453 | 0.393      | 0.144    | 0.526       | 0.401      | 0.674          | 0.758          | 0.459      |
|                |      |        |          |       |       |         |       | -     | -     |            |          |             |            | -              | -              |            |
| Density        |      |        |          |       |       |         | 0.688 | 0.813 | 0.583 | 0.671      | -0.181   | -0.499      | -0.322     | 0.694          | 0.871          | 0.488      |
|                |      |        |          |       |       |         |       | -     | -     |            |          |             |            | -              | -              |            |
| L*             |      |        |          |       |       |         |       | 0.961 | 0.746 | 0.992      | 0.134    | 0.138       | 0.240      | 0.219          | 0.453          | 0.296      |
|                |      |        |          |       |       |         |       |       |       | -          |          |             |            |                |                | -          |
| a*             |      |        |          |       |       |         |       |       | 0.791 | 0.939      | -0.104   | 0.003       | -0.117     | 0.330          | 0.536          | 0.392      |
|                |      |        |          |       |       |         |       |       |       | -          |          |             |            |                |                | -          |
| b*             |      |        |          |       |       |         |       |       |       | 0.656      | -0.320   | -0.018      | -0.216     | 0.423          | 0.668          | 0.466      |
|                |      |        |          |       |       |         |       |       |       |            |          |             |            | -              | -              |            |
| $\Delta E$     |      |        |          |       |       |         |       |       |       |            | 0.091    | 0.153       | 0.232      | 0.136          | 0.355          | 0.218      |
|                |      |        |          |       |       |         |       |       |       |            |          |             |            | -              |                |            |
| Hardness       |      |        |          |       |       |         |       |       |       |            |          | 0.254       | 0.757      | 0.214          | 0.038          | 0.529      |
|                |      |        |          |       |       |         |       |       |       |            |          |             |            |                |                | -          |
| Crunchiness    |      |        |          |       |       |         |       |       |       |            |          |             | 0.689      | 0.565          | 0.777          | 0.310      |
|                |      |        |          |       |       |         |       |       |       |            |          |             |            |                |                |            |
| Crispiness     |      |        |          |       |       |         |       |       |       |            |          |             |            | 0.110          | 0.383          | 0.195      |
|                |      |        |          |       |       |         |       |       |       |            |          |             |            |                |                | -          |
| T <sub>0</sub> |      |        |          |       |       |         |       |       |       |            |          |             |            |                | 0.828          | 0.857      |
|                |      |        |          |       |       |         |       |       |       |            |          |             |            |                |                | -          |
| T <sub>p</sub> |      |        |          |       |       |         |       |       |       |            |          |             |            |                |                | 0.627      |

DT: Die temperature; MC: Feed moisture content; SME: Specific mechanical energy; EI: Expansion index; L\*: Darkness/lightness; a\*: Greenness/redness; b\*: Blueness/yellowness;  $\Delta E$ : Overall colour difference; T<sub>0</sub>: Onset temperature; T<sub>p</sub>: Peak temperature;  $\Delta H$ : Enthalpy of starch gelatinization.

**Table S2.** Pearson correlation coefficients between extrusion variables and extrudate properties in yellow pea (YP) third-generation products.

|                | MC   | Torque | Die      |       |       | Density | L*    | a*    | b*    | $\Delta E$ | Hardness | Crunchiness | Crispiness | T <sub>0</sub> | T <sub>p</sub> | $\Delta H$ |
|----------------|------|--------|----------|-------|-------|---------|-------|-------|-------|------------|----------|-------------|------------|----------------|----------------|------------|
|                |      | e      | pressure | SME   | EI    | y       |       |       |       |            | s        | s           | s          |                |                |            |
|                | 0.00 |        |          | -     |       |         | -     |       |       | -          |          |             |            | -              |                | -          |
| DT             | 0    | -0.473 | -0.531   | 0.850 | 0.431 | -0.559  | 0.195 | 0.696 | 0.392 | 0.090      | -0.328   | 0.226       | -0.112     | 0.092          | 0.100          | 0.572      |
|                |      |        |          | -     | -     |         | -     |       |       | -          |          |             |            | -              | -              | -          |
| MC             |      | -0.850 | -0.819   | 0.473 | 0.231 | 0.665   | 0.691 | 0.483 | 0.642 | 0.691      | 0.211    | -0.044      | 0.136      | 0.204          | 0.286          | 0.726      |
|                |      |        |          |       |       |         |       | -     | -     |            |          |             |            | -              |                |            |
| Torque         |      |        | 0.988    | 0.821 | 0.164 | -0.395  | 0.788 | 0.550 | 0.577 | 0.882      | -0.472   | -0.607      | -0.651     | 0.031          | 0.205          | 0.879      |
| Die            |      |        |          |       |       |         |       | -     | -     |            |          |             |            | -              |                |            |
| pressure       |      |        |          | 0.849 | 0.163 | -0.377  | 0.834 | 0.600 | 0.638 | 0.917      | -0.414   | -0.584      | -0.642     | 0.057          | 0.084          | 0.886      |
|                |      |        |          |       |       |         |       | -     | -     |            |          |             |            |                |                |            |
| SME            |      |        |          |       | 0.023 | 0.094   | 0.964 | 0.864 | 0.895 | 0.963      | -0.011   | -0.152      | -0.260     | 0.017          | 0.163          | 0.826      |
|                |      |        |          |       |       |         |       | -     |       |            |          |             |            | -              |                |            |
| EI             |      |        |          |       |       | -0.605  | 0.213 | 0.168 | 0.076 | 0.276      | -0.137   | 0.173       | -0.018     | 0.278          | 0.105          | 0.161      |
|                |      |        |          |       |       |         | -     | -     |       | -          |          |             |            | -              |                | -          |
| Density        |      |        |          |       |       |         | 0.369 | 0.208 | 0.180 | 0.453      | 0.285    | -0.129      | 0.224      | 0.045          | 0.018          | 0.262      |
|                |      |        |          |       |       |         |       | -     | -     |            |          |             |            | -              | -              |            |
| L*             |      |        |          |       |       |         |       | 0.741 | 0.951 | 0.989      | -0.017   | -0.156      | -0.331     | 0.023          | 0.014          | 0.827      |
|                |      |        |          |       |       |         |       |       |       | -          |          |             |            | -              |                | -          |
| a*             |      |        |          |       |       |         |       |       | 0.878 | 0.645      | -0.081   | 0.254       | 0.299      | 0.018          | 0.067          | 0.611      |
|                |      |        |          |       |       |         |       |       |       | -          |          |             |            | -              |                | -          |
| b*             |      |        |          |       |       |         |       |       |       | 0.893      | -0.043   | 0.179       | 0.322      | 0.061          | 0.097          | 0.690      |
|                |      |        |          |       |       |         |       |       |       |            |          |             |            | -              |                |            |
| $\Delta E$     |      |        |          |       |       |         |       |       |       |            | -0.048   | -0.137      | -0.324     | 0.071          | 0.036          | 0.875      |
|                |      |        |          |       |       |         |       |       |       |            |          |             |            | -              |                | -          |
| Hardness       |      |        |          |       |       |         |       |       |       |            |          | 0.072       | 0.727      | 0.263          | 0.114          | 0.155      |
|                |      |        |          |       |       |         |       |       |       |            |          |             |            | -              | -              | -          |
| Crunchiness    |      |        |          |       |       |         |       |       |       |            |          |             | 0.548      | 0.079          | 0.009          | 0.464      |
|                |      |        |          |       |       |         |       |       |       |            |          |             |            |                |                | -          |
| Crispiness     |      |        |          |       |       |         |       |       |       |            |          |             |            | 0.006          | 0.127          | 0.532      |
|                |      |        |          |       |       |         |       |       |       |            |          |             |            | -              | -              | -          |
| T <sub>0</sub> |      |        |          |       |       |         |       |       |       |            |          |             |            |                | 0.213          | 0.245      |
|                |      |        |          |       |       |         |       |       |       |            |          |             |            |                |                |            |
| T <sub>p</sub> |      |        |          |       |       |         |       |       |       |            |          |             |            |                |                | 0.264      |

DT: Die temperature; MC: Feed moisture content; SME: Specific mechanical energy; EI: Expansion index; L\*: Darkness/lightness; a\*: Greenness/redness; b\*: Blueness/yellowness;  $\Delta E$ : Overall colour difference; T<sub>0</sub>: Onset temperature; T<sub>p</sub>: Peak temperature;  $\Delta H$ : Enthalpy of starch gelatinization.
